# Supplementary material for: Purine Metabolites in Tumor-Derived Exosomes May Facilitate Immune Escape of Head and Neck Squamous Cell Carcinoma
Source: Cancers (Basel). 2020 Jun 17;12(6):1602. doi: 10.3390/cancers12061602 (PMC7352909; doi:10.3390/cancers12061602)
Supplement: Supplementary file 1 [file cancers-12-01602-s001.pdf]

# Supplementary Materials: Purine Metabolites in Tumor-Derived Exosomes May Facilitate Immune Escape of Head and Neck Squamous Cell Carcinoma

Nils Ludwig, Delbert G. Gillespie, Torsten E. Reichert, Edwin K. Jackson and Theresa L. Whiteside

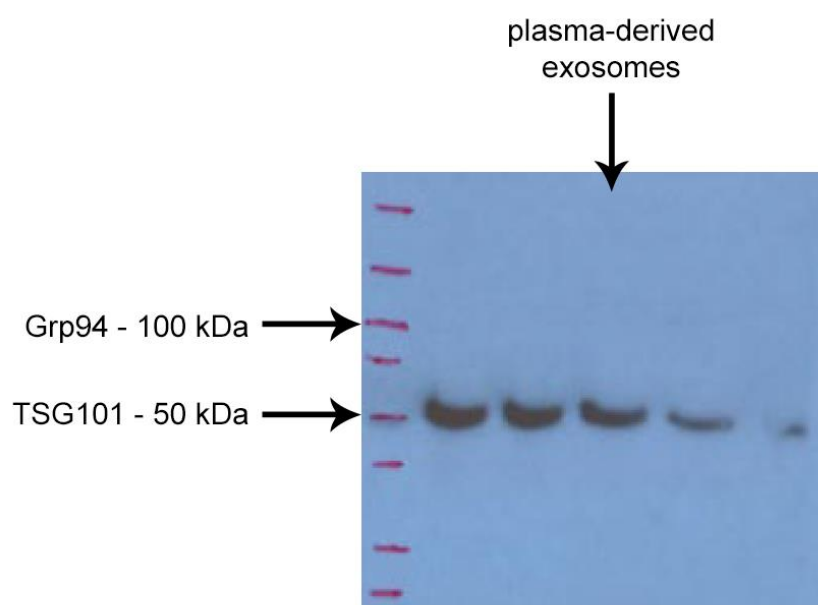

**Figure S1.** Whole blot image of western blots shown in Figure 2C.
